# Supplementary material for: The encapsulated lithium effect of Li@C60Cl8 remarkably enhances the static first hyperpolarizability
Source: Royal Society of Chemistry journal article supplement (doi:10.1039/c3ra40909k), 2013-01-01
Supplement: c3ra40909k.pdf [file c3ra40909k.pdf]

## Supporting Information

### **The Encapsulated Lithium Effect of $\text{Li}@C_{60}\text{Cl}_8$ Remarkably Enhances the Static First Hyperpolarizability**

Li-Jie Wang, Shi-Ling Sun, Rong-Lin Zhong, Yan Liu, Dong-Lai Wang, Heng-Qing Wu, Hong-Liang Xu,\*

Xiu-Mei Pan\* and Zhong-Min Su

*Institute of Functional Materials Chemistry, Faculty of Chemistry Northeast Normal University, Changchun*

*130024, Jilin (P. R. China) E-mail: [hlxu@nenu.edu.cn](mailto:hlxu@nenu.edu.cn), [panxm460@nenu.edu.cn](mailto:panxm460@nenu.edu.cn)*

**Table S1.** The NBO charge of all the atoms in  $C_{60}$  ( $C_{2v}$ ),  $C_{60}Cl_8$  and  $Li@C_{60}Cl_8$  at B3LYP/6-31G(d) level

|            | $Li@C_{60}Cl_8$ | $C_{60}Cl_8$ | $C_{60}$ ( $C_{2v}$ ) |            | $Li@C_{60}Cl_8$ | $C_{60}Cl_8$ | $C_{60}$ ( $C_{2v}$ ) |
|------------|-----------------|--------------|-----------------------|------------|-----------------|--------------|-----------------------|
| $C_{(1)}$  | 0.00486         | 0.00551      | 0.01451               | $C_{(35)}$ | -0.04086        | 0.00582      | 0.003                 |
| $C_{(2)}$  | -0.00776        | -0.00004     | 0.01451               | $C_{(36)}$ | -0.02291        | 0.02748      | 0.00115               |
| $C_{(3)}$  | -0.00776        | -0.00003     | -0.00922              | $C_{(37)}$ | -0.05076        | 0.00038      | 0.00115               |
| $C_{(4)}$  | 0.00486         | 0.00552      | 0.01662               | $C_{(38)}$ | -0.04712        | -0.05194     | -0.00173              |
| $C_{(5)}$  | -0.00073        | 0.00294      | -0.00922              | $C_{(39)}$ | 0.01544         | 0.01615      | 0.00208               |
| $C_{(6)}$  | -0.00073        | 0.00293      | -0.01253              | $C_{(40)}$ | 0.01544         | 0.01612      | 0.00134               |
| $C_{(7)}$  | -0.00054        | -0.00133     | 0.01356               | $C_{(41)}$ | 0.00891         | 0.01491      | -0.00346              |
| $C_{(8)}$  | -0.00054        | -0.00137     | -0.01253              | $C_{(42)}$ | -0.00992        | -0.00292     | -0.00346              |
| $C_{(9)}$  | 0.00486         | 0.00553      | -0.00302              | $C_{(43)}$ | 0.00463         | 0.00284      | 0.00134               |
| $C_{(10)}$ | -0.00073        | 0.00293      | 0.003                 | $C_{(44)}$ | 0.00611         | 0.0032       | 0.00208               |
| $C_{(11)}$ | 0.00486         | 0.0055       | -0.00909              | $C_{(45)}$ | -0.00294        | 0.01192      | 0.00208               |
| $C_{(12)}$ | -0.00054        | -0.00138     | -0.00909              | $C_{(46)}$ | -0.04484        | -0.05204     | -0.00173              |
| $C_{(13)}$ | 0.00923         | 0.00873      | -0.00922              | $C_{(47)}$ | -0.02291        | 0.0275       | 0.0035                |
| $C_{(14)}$ | 0.00891         | 0.01489      | 0.01662               | $C_{(48)}$ | -0.04086        | 0.00573      | -0.00056              |
| $C_{(15)}$ | -0.00992        | -0.00288     | -0.00922              | $C_{(49)}$ | -0.04484        | -0.05202     | -0.00192              |
| $C_{(16)}$ | 0.00463         | 0.00285      | -0.00909              | $C_{(50)}$ | -0.04484        | -0.05206     | 0.01356               |
| $C_{(17)}$ | -0.00992        | -0.00291     | -0.00909              | $C_{(51)}$ | -0.02291        | 0.02749      | -0.00056              |
| $C_{(18)}$ | 0.00891         | 0.0149       | 0.003                 | $C_{(52)}$ | -0.05076        | 0.00034      | 0.0035                |
| $C_{(19)}$ | 0.00923         | 0.00872      | -0.00302              | $C_{(53)}$ | -0.05076        | 0.0004       | -0.00173              |
| $C_{(20)}$ | 0.00923         | 0.00871      | 0.0035                | $C_{(54)}$ | -0.04712        | -0.05209     | 0.00208               |
| $C_{(21)}$ | 0.01544         | 0.01619      | -0.00056              | $C_{(55)}$ | 0.005           | 0.01455      | 0.00134               |
| $C_{(22)}$ | 0.01544         | 0.01607      | -0.00192              | $C_{(56)}$ | 0.00891         | 0.01487      | -0.00021              |
| $C_{(23)}$ | -0.04712        | -0.05193     | -0.00056              | $C_{(57)}$ | -0.00992        | -0.00287     | -0.00021              |
| $C_{(24)}$ | 0.005           | 0.01456      | 0.0035                | $C_{(58)}$ | 0.00923         | 0.0087       | 0.00134               |
| $C_{(25)}$ | -0.00294        | 0.01197      | -0.00173              | $C_{(59)}$ | -0.00073        | 0.00295      | -0.00346              |
| $C_{(26)}$ | 0.00611         | 0.0032       | 0.00115               | $C_{(60)}$ | -0.02291        | 0.02759      | -0.00346              |
| $C_{(27)}$ | -0.00294        | 0.01198      | 0.00115               | $Cl_{(1)}$ | -0.0158         | -0.01793     |                       |
| $C_{(28)}$ | 0.005           | 0.01451      | 0.003                 | $Cl_{(2)}$ | -0.0158         | -0.01818     |                       |
| $C_{(29)}$ | -0.00054        | -0.00132     | -0.00302              | $Cl_{(3)}$ | 0.01742         | 0.01792      |                       |
| $C_{(30)}$ | -0.05076        | 0.00031      | -0.01253              | $Cl_{(4)}$ | 0.01742         | 0.01785      |                       |
| $C_{(31)}$ | -0.04712        | -0.05199     | 0.01451               | $Cl_{(5)}$ | 0.01742         | 0.01783      |                       |
| $C_{(32)}$ | 0.005           | 0.01453      | 0.01451               | $Cl_{(6)}$ | 0.01742         | 0.01831      |                       |
| $C_{(33)}$ | -0.00294        | 0.01198      | -0.01253              | $Cl_{(7)}$ | -0.0158         | -0.01808     |                       |
| $C_{(34)}$ | -0.04484        | -0.05233     | -0.00302              | $Cl_{(8)}$ | -0.0158         | -0.01819     |                       |
